# Supplementary material for: Synthesis of CdWO4nanorods and investigation of the photocatalytic activity
Source: Royal Society of Chemistry journal article supplement (doi:10.1039/c3cp53403k), 2013-10-17
Supplement: c3cp53403k.pdf [file c3cp53403k.pdf]

# Supporting Information

## **Synthesis of CdWO<sub>4</sub> nanorods and investigation on the photocatalytic activity**

Di Li,<sup>a,b</sup> Xiaojuan Bai,<sup>a</sup> Jing Xu,<sup>a</sup> Xinguo Ma<sup>c</sup> and Yongfa Zhu<sup>\*a</sup>

<sup>a</sup>Department of Chemistry, Tsinghua University, Beijing, 100084, China

<sup>b</sup>School of Metallurgical Engineering, Xi'an University of Architecture and Technology, Xi'an 710055, People's Republic of China

<sup>c</sup>Department of Physics and Materials Science, City University of Hong Kong, Hong Kong, China

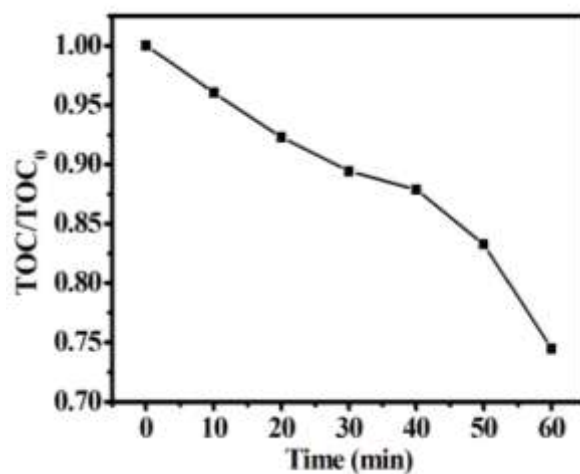

**Fig. 1** TOC removal plots of the CdWO<sub>4</sub> nanorods prepared at pH 7 for 24 h under UV irradiation.
